# Supplementary material for: In vivo rendezvous of small nucleic acid drugs with charge-matched block catiomers to target cancers
Source: PubMed Central journal article supplement (PMC6482185; doi:10.1038/s41467-019-09856-w), 2019-04-24
Supplement: 41467_2019_9856_MOESM1_ESM.pdf [file 41467_2019_9856_MOESM1_ESM.pdf]

## Supplementary Information

### ***In Vivo* Rendezvous of Small Nucleic Acid Drugs with Charge-Matched Block Cationomers to Target Cancers**

Sumiyo Watanabe<sup>1,2,3</sup>, Kotaro Hayashi<sup>4</sup>, Kazuko Toh<sup>4</sup>, Hyun Jin Kim<sup>1</sup>, Xueying Liu<sup>4</sup>, Hiroyuki Chaya<sup>1,5</sup>, Shigeto Fukushima<sup>4</sup>, Keisuke Katsushima<sup>6</sup>, Yutaka Kondo<sup>6</sup>, Satoshi Uchida<sup>7</sup>, Satomi Ogura<sup>4,5</sup>, Takahiro Nomoto<sup>8</sup>, Hiroyasu Takemoto<sup>8</sup>, Horacio Cabral<sup>7</sup>, Hiroaki Kinoh<sup>4</sup>, Hiroyoshi Y. Tanaka<sup>9</sup>, Mitsunobu R. Kano<sup>9,10</sup>, Yu Matsumoto<sup>1</sup>, Hiroshi Fukuhara<sup>11</sup>, Shunya Uchida<sup>2</sup>, Masaomi Nangaku<sup>3</sup>, Kensuke Osada<sup>7</sup>, Nobuhiro Nishiyama<sup>8</sup>, Kanjiro Miyata<sup>1,5</sup>, and Kazunori Kataoka<sup>4,12</sup>

1. Center for Disease Biology and Integrative Medicine, Graduate School of Medicine, The University of Tokyo, 7-3-1 Hongo, Bunkyo-ku, Tokyo 113-0033, Japan.
2. Division of Internal Medicine, School of Medicine, Teikyo University, 2-11-1 Kaga, Itabashi-ku, Tokyo 173-8606, Japan.
3. Division of Nephrology and Endocrinology, Graduate School of Medicine, The University of Tokyo, 7-3-1 Hongo, Bunkyo-ku, Tokyo 113-8544, Japan.
4. Innovation Center of NanoMedicine, Kawasaki Institute of Industrial Promotion, 3-25-14 Tonomachi, Kawasaki-ku, Kawasaki 210-0821, Japan.
5. Department of Materials Engineering, Graduate School of Engineering, The University of Tokyo, 7-3-1 Hongo, Bunkyo-ku, Tokyo 113-8656, Japan.
6. Division of Cancer Biology, Nagoya University Graduate School of Medicine, 65 Tsurumai-cho, Showa-ku, Nagoya 466-8550, Japan
7. Department of Bioengineering, Graduate School of Engineering, The University of Tokyo, 7-3-1 Hongo, Bunkyo-ku, Tokyo 113-8656, Japan.
8. Laboratory for Chemistry and Life Science, Institute of Innovative Research, Tokyo Institute of Technology, R1-11, 4259 Nagatsuta, Midori-ku, Yokohama 226-8503, Japan.
9. Department of Pharmaceutical Biomedicine, Okayama University Graduate School of Medicine, Dentistry, and Pharmaceutical Sciences, 1-1-1 Tsushima-naka, Kita-ku, Okayama-shi, Okayama Prefecture 700-8530, Japan.
10. Department of Pharmaceutical Biomedicine, Okayama University Graduate School of Interdisciplinary Science and Engineering in Health Systems, 1-1-1 Tsushima-naka, Kita-ku, Okayama-shi, Okayama Prefecture 700-8530, Japan.
11. Department of Urology, Graduate School of Medicine, The University of Tokyo, 7-3-1 Hongo, Bunkyo-ku, Tokyo 113-8544, Japan.
12. Policy Alternatives Research Institute, The University of Tokyo, 7-3-1 Hongo, Bunkyo-ku, Tokyo 113-0033, Japan.

S. Watanabe, K. Hayashi, K. Toh, and H. J. Kim contributed equally. K. Miyata and K. Kataoka jointly supervised this work. Correspondence and requests for materials should be addressed to K.M. (miyata@bmw.t.u-tokyo.ac.jp) and K.Kata. (kataoka@pari.u-tokyo.ac.jp).

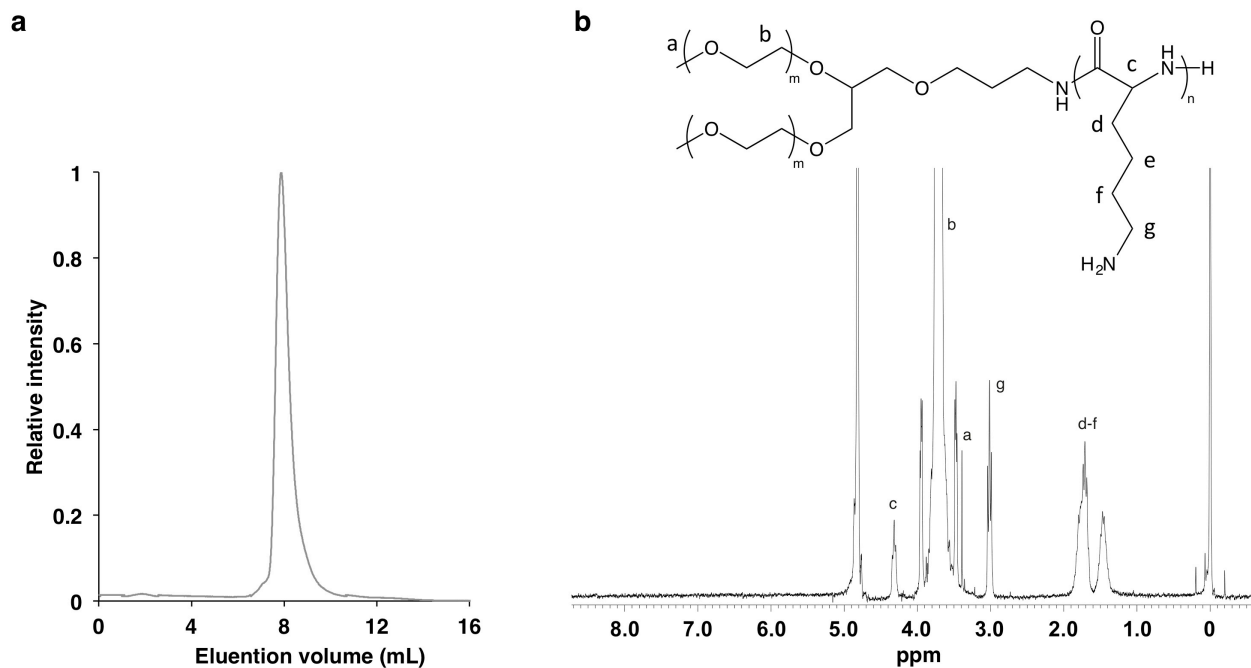

**Supplementary Figure 1 | Characterisation of YBC. a**, SEC chart of YBC. **b**, <sup>1</sup>H-NMR spectrum of YBC (polymer concentration: 10 mg mL<sup>-1</sup>, solvent: D<sub>2</sub>O, temperature: 20 °C).

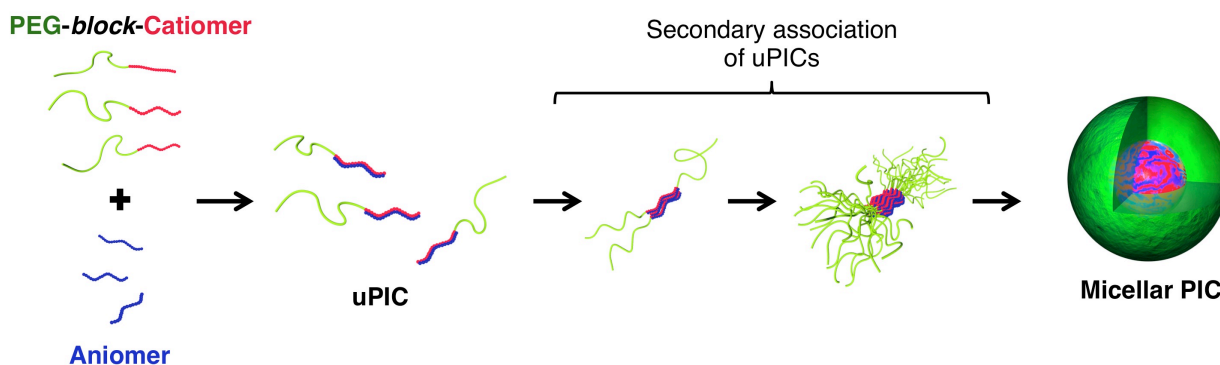

**Supplementary Figure 2 | Schematic illustration of multimolecular assemblies from PEG-block-cationomers and anionomers.** Micellar PICs are formed from a pair of oppositely charged block-ionomers and homo-ionomers. Charge-neutralised minimal pairs, termed uPICs, are assumed to form in the initial stage of association, followed by the secondary process of multimolecular assembly.

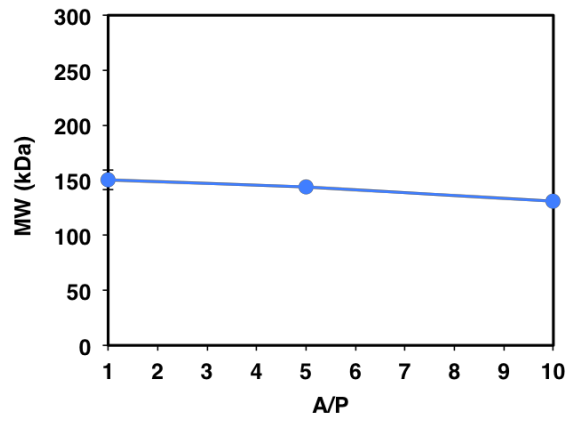

**Supplementary Figure 3 | MW of uPICs prepared at varying A/P ratios.** The MW was determined by SE-AUC. The uPIC (600 nM siRNA) was ultracentrifuged for over two days until an equilibrium was reached between sedimentation and diffusion, and the siRNA absorbance (260 nm) was measured as a function of centrifugal radii. The data obtained were analysed to determine the apparent MW of uPIC. Data represent the means  $\pm$  s.d. for 3 replicate measurements.

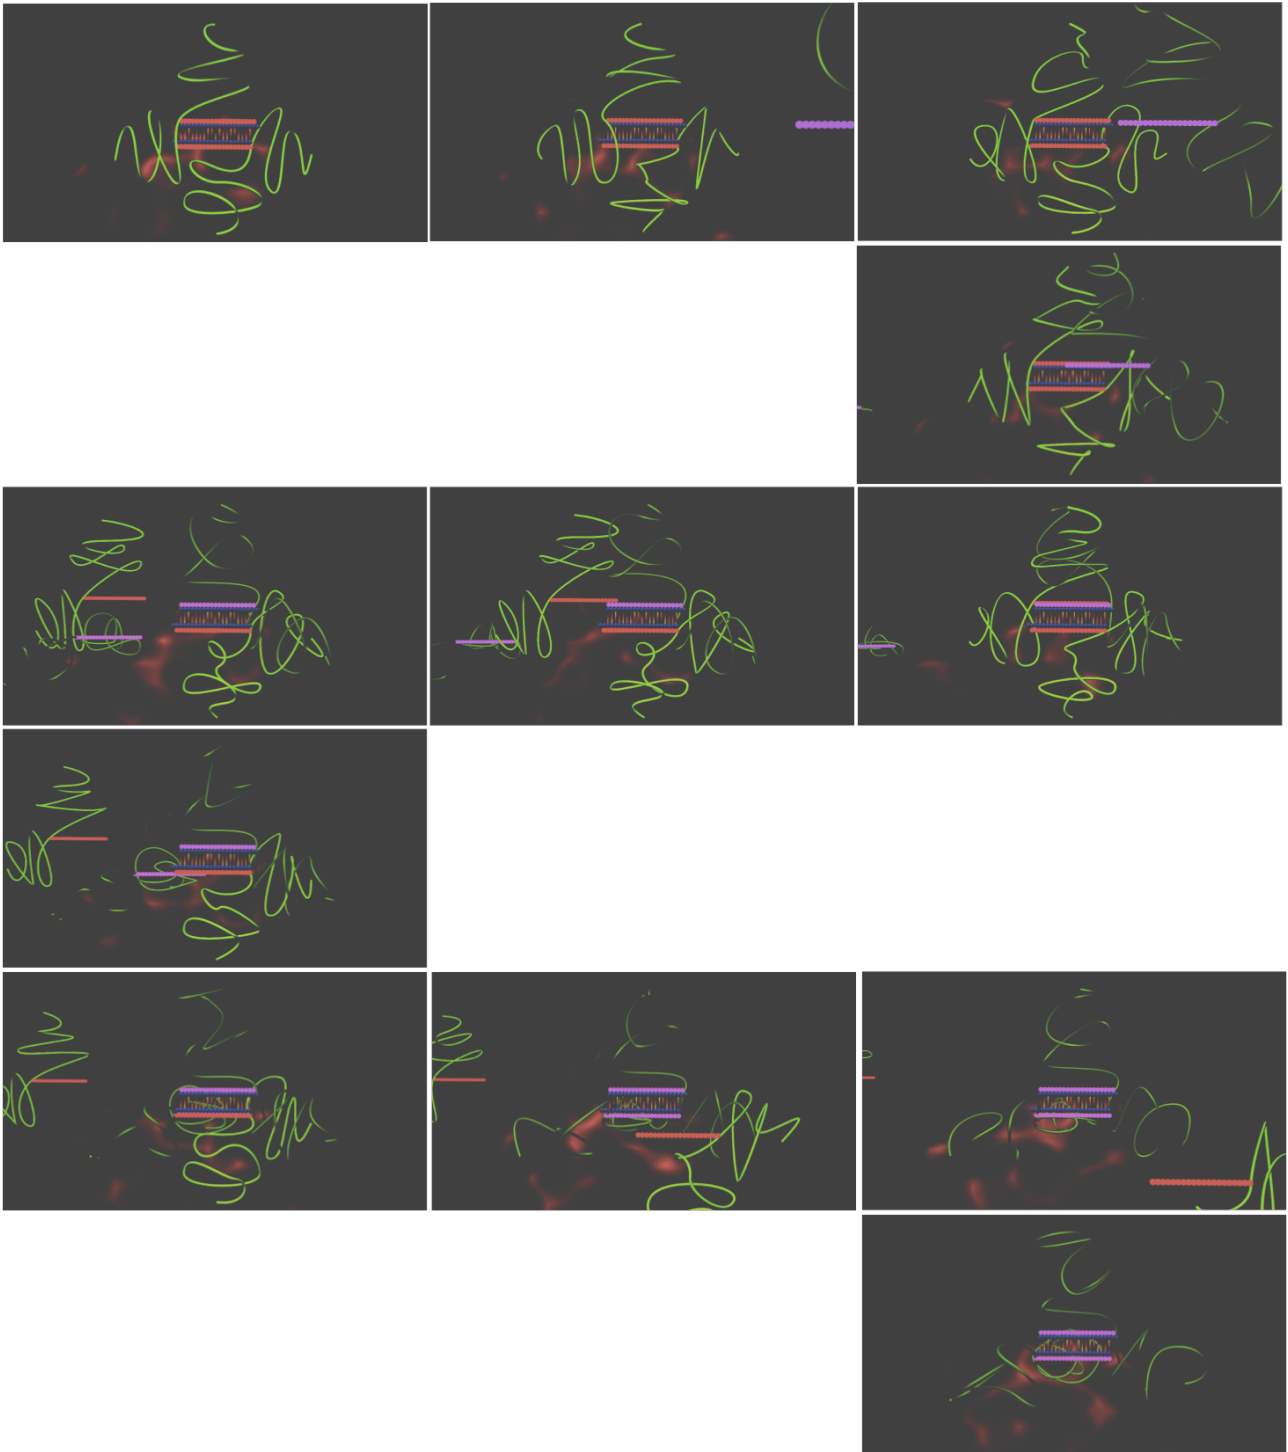

**Supplementary Figure 4 | Dynamic equilibrium of uPIC with free YBC (divided images of Supplementary Movie 1).**



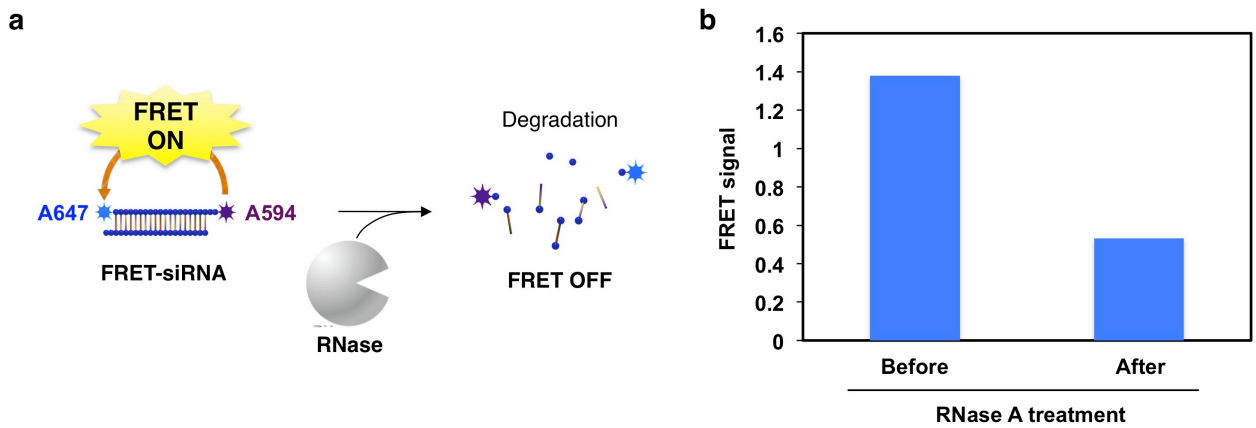

**Supplementary Figure 5 | FRET analysis of siRNA integrity.** **a**, Schematic illustration of FRET analysis of siRNA integrity. Intact FRET-siRNA generates significant FRET signal through the proximate dyes, whereas siRNA degradation elicits the loss of FRET signal due to the dye separation. **b**, FRET signal of FRET-siRNA before and after treatment with RNase A ( $1 \mu\text{g mL}^{-1}$ ,  $37^\circ\text{C}$ , 9 h). The FRET signal was defined as a fluorescence intensity ratio: [intensity at 669 nm]/[intensity at 622 nm] under excitation at 561 nm.

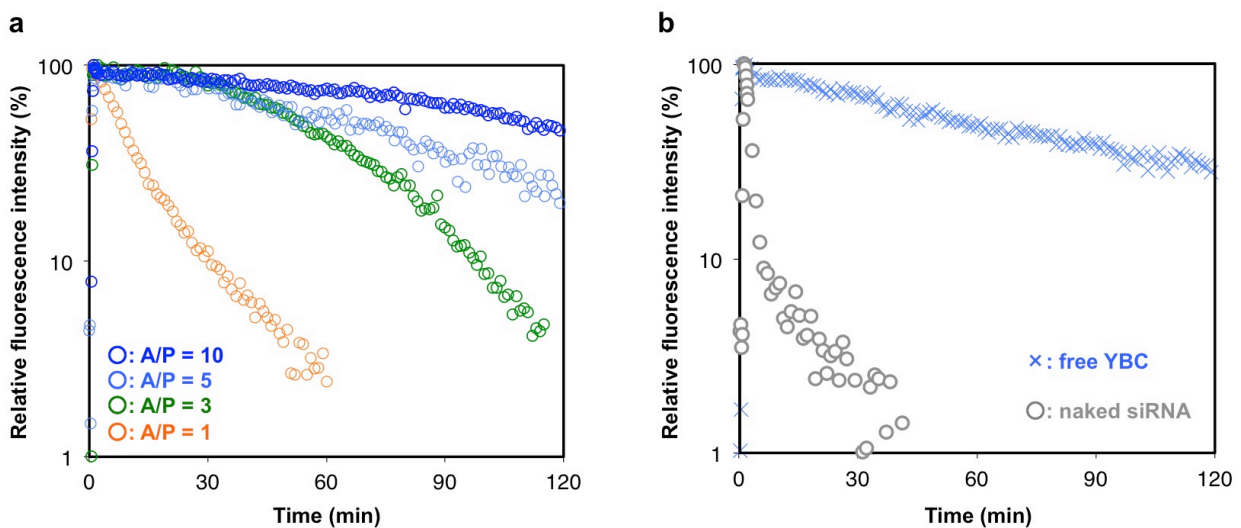

**Supplementary Figure 6 | Effect of free YBC on the blood circulation property of A647-siRNA/uPICs.** **a**, Blood circulation properties of a series of uPICs prepared at varying A/P ratios were evaluated based on the fluorescence of A647-siRNA using an IVCLSM. Each A647-siRNA/uPIC was intravenously injected from the tail vein of mouse at 2 nmol A647-siRNA per mouse, similar to Figure 3e. **b**, Blood circulation property of naked A647-siRNA (2 nmol per mouse) and free A647-YBC (40 nmol per mouse) after systemic administration into the tail vein of mouse. These dosages correspond to those of uPIC prepared at A/P = 10.

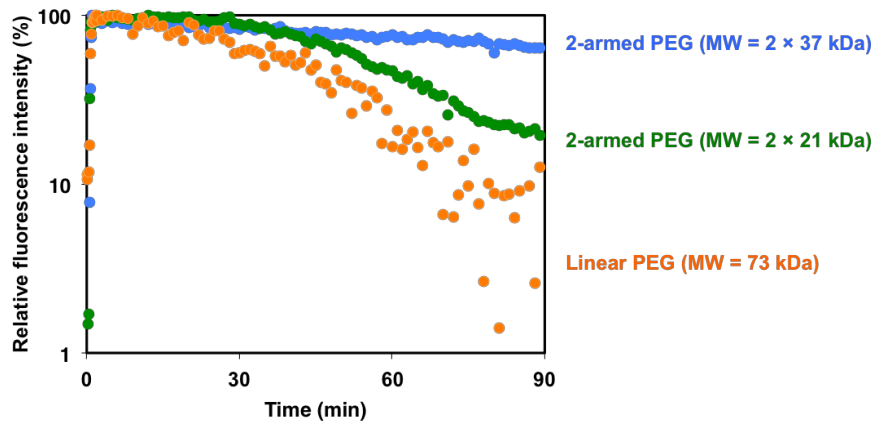

**Supplementary Figure 7 | Blood circulation of A647-siRNA/uPIC comprising varying PEG chains.** The blood circulation property of a series of uPICs was evaluated based on the fluorescence of A647-siRNA using an IVCLSM. Each A647-siRNA/uPIC was intravenously injected from the tail vein of mouse at 24  $\mu$ g A647-siRNA per mouse, similar to [Figure 3e](#). Control block cationomers comprising two-armed PEG with MW = 2  $\times$  21 kDa or linear PEG with MW = 73 kDa were synthesised through a synthetic route similar to YBC with MW = 2  $\times$  37 kDa using the corresponding PEG molecule as a macroinitiator.

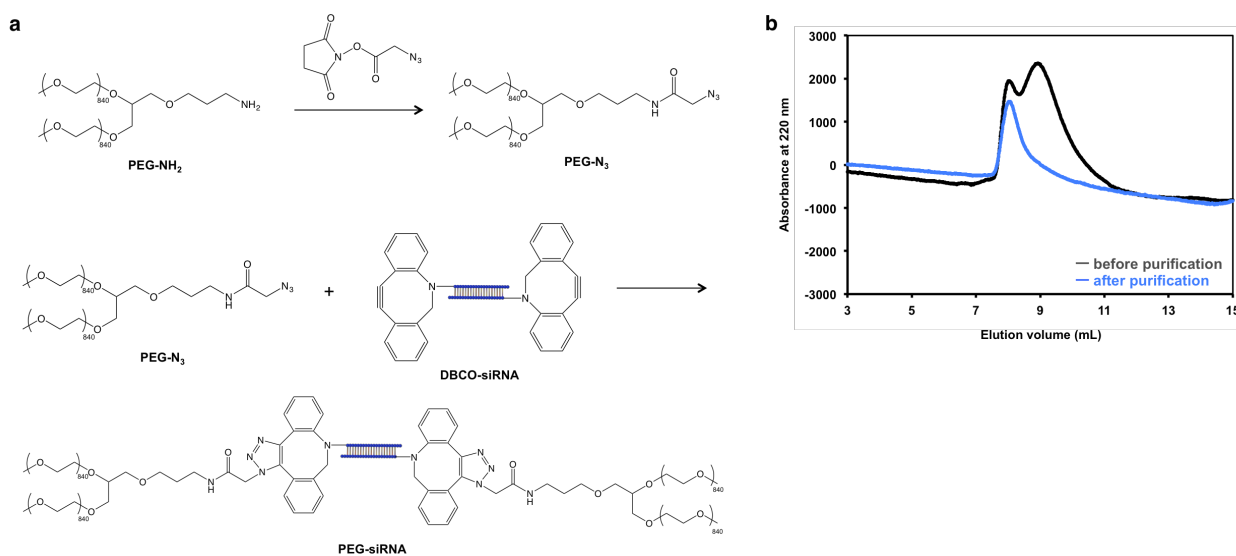

**Supplementary Figure 8 | Synthesis of PEG-siRNA.** **a**,  $\alpha$ -Methoxy- $\omega$ -amino-two-armed PEG (PEG-NH<sub>2</sub>, MW = 2 × 37 kDa) (190 mg, NOF) and azido succinimidyl acetic acid NHS (5.3 mg, Nanocs, New York, NY, USA) were dissolved in DMF and stirred for 4 h at 45 °C under Ar. *N,N*-Diisopropylethylamine (1.7 mg, Sigma-Aldrich) was then added to the mixture and further stirred overnight. The mixture was precipitated in diethyl ether, and  $\alpha$ -methoxy- $\omega$ -azide-two-armed PEG (PEG-N<sub>3</sub>) was obtained as a white powder. siRNA modified with a dibenzylcyclooctyne moiety at both 5' ends (DBCO-siRNA) was purchased from Hokkaido System Science. DBCO-siRNA (50  $\mu$ M, 100  $\mu$ L in deionised water) was mixed with PEG-N<sub>3</sub> dissolved in deionised water (36 mg, 900  $\mu$ L) and stirred at 40 °C for 2 days. The conjugate between DBCO-siRNA and PEG-N<sub>3</sub> was purified using AKTA explorer 10S equipped with a Superdex 200 10/300 column (GE Healthcare) eluted with 10 mM sodium phosphate buffer (pH 7.4) containing 150 mM NaCl. The product was desalted and then lyophilised. **b**, SEC charts of PEG-siRNA before and after purification. The sample was eluted in a Superdex 200 column (flow rate 0.5 mL min<sup>-1</sup>, 10 mM sodium phosphate containing 150 mM NaCl, pH 7.4). The PEG-siRNA was collected as a fraction between 8 mL and 8.5 mL in the elution volume.

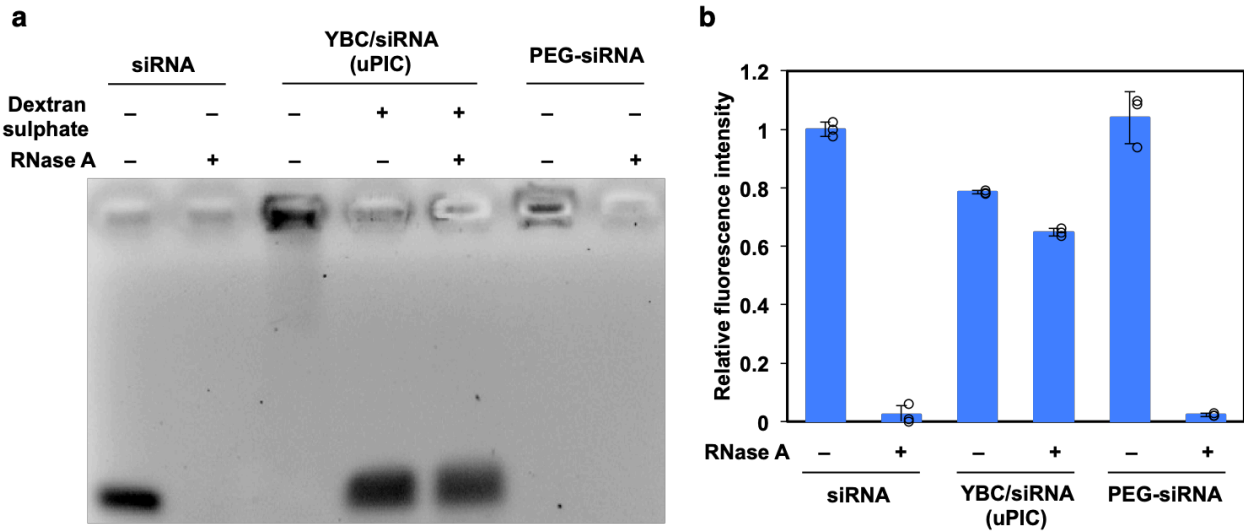

**Supplementary Figure 9 | Resistance of uPIC to RNase attack.** Naked siRNA, uPIC (A/P = 1), and PEG-siRNA (5  $\mu$ M, 2  $\mu$ L) were independently treated with RNase A (1  $\mu$ M, 1  $\mu$ L) for 30 min at ambient temperature. Each sample was further treated with an RNase inhibitor (4  $\mu$ L, Nacalai Tesque) for 5 min, followed by a 5-min incubation with sodium dextran sulphate (50 mg mL<sup>-1</sup>, 3  $\mu$ L) for siRNA release from uPIC. The sample solutions were analysed by electrophoresis on 1% agarose gel with ethidium bromide visually using Molecular Imager FX (Bio-Rad) (a) and by fluorescence of SYBR Green I (Lonza) quantitatively using a fluorospectrometer, NanoDrop 3300 (b). The fluorescence intensity was normalised to that obtained from non-treated control samples. Data represent the means  $\pm$  s.d.  $n = 3$ .

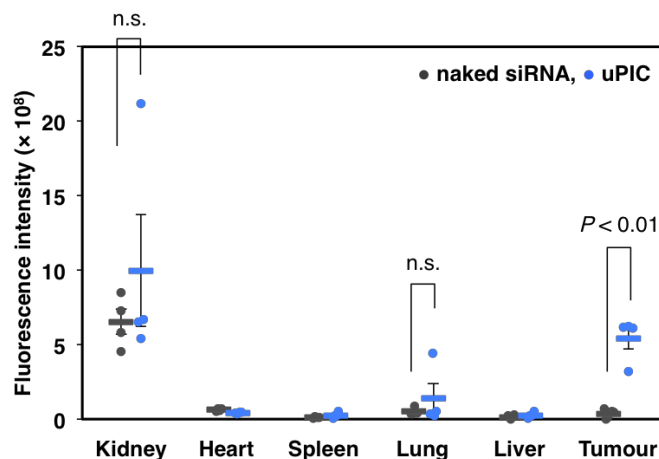

**Supplementary Figure 10 | Biodistribution of naked Cy5-siRNA and Cy5-siRNA/uPIC after systemic administration.** At 48 h after systemic administration (72  $\mu$ g Cy5-siRNA per mouse), fluorescence intensities from the excised organs were determined using an IVIS instrument. Data represent the means (bars)  $\pm$  s.e.m. with individual data points.  $n = 4$ . n.s.: not significant ( $P > 0.05$ ).

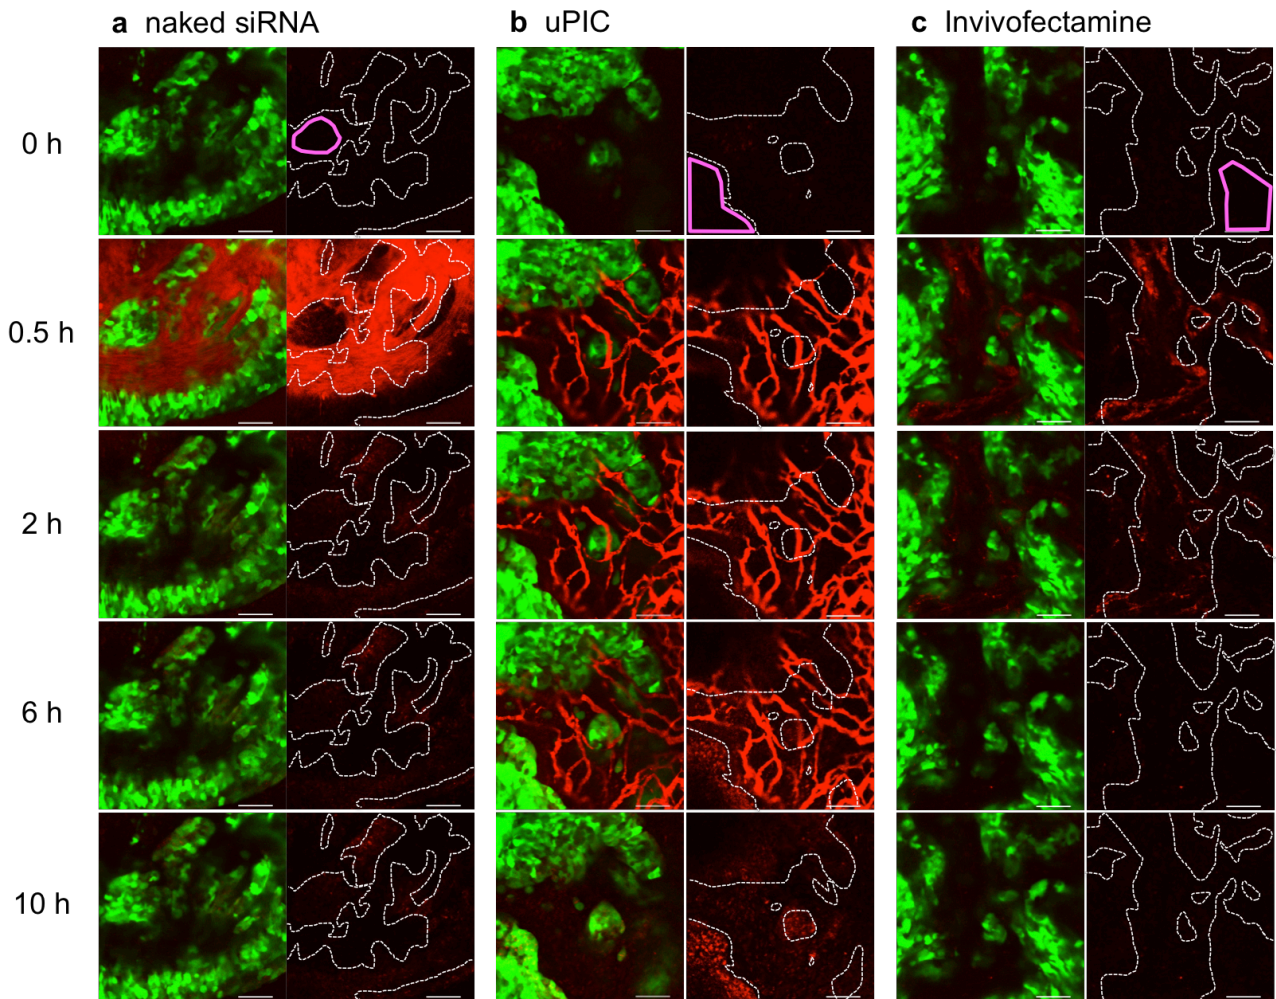

**Supplementary Figure 11 | Distribution profiles of naked Cy5-siRNA, Cy5-siRNA/uPIC, and Cy5-siRNA/LNP in tumour tissue.** IVCLSM images of subcutaneous GFP-BxPC3 tumour tissues after intravenous injection of Cy5-siRNA in the forms of naked (a), uPIC (b), and Invivofectamine<sup>®</sup> (c) (24  $\mu$ g siRNA per mouse, scale bar: 100  $\mu$ m). GFP and Cy5 signals are shown in green and red, respectively. Cancer cell nests are indicated by a dashed white line, as defined by the GFP signal derived from GFP-BxPC3 cells. Regions enclosed by the magenta solid line in the upper-most images (0 h) indicate the ROI used for the quantitative analysis of time-dependent changes in Cy5 fluorescence in the cancer cell nest (Fig. 3h).

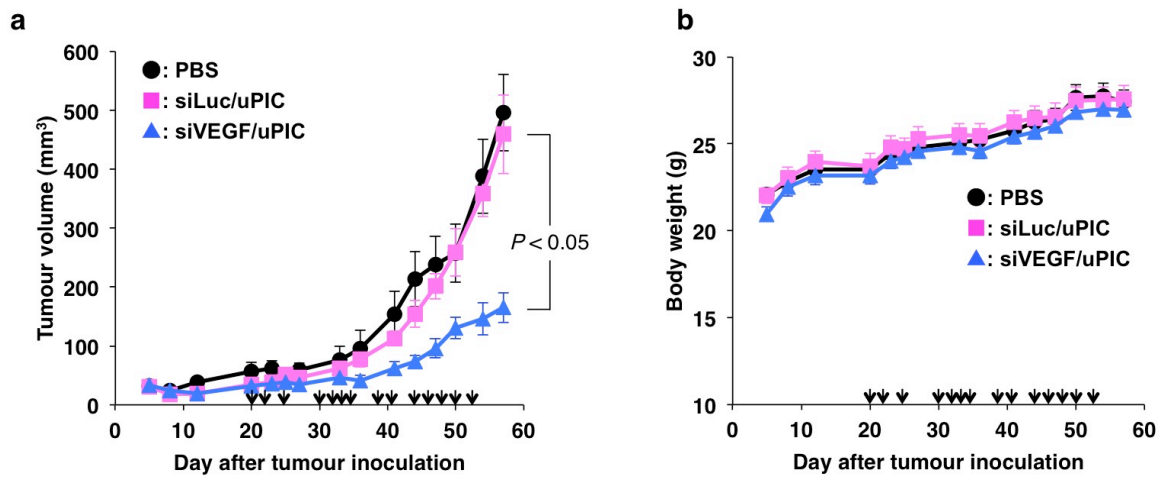

**Supplementary Figure 12 | siVEGF/uPIC treatment of a subcutaneous BxPC3 tumour model.**

**a**, Antitumour activity of siVEGF/uPIC against subcutaneous BxPC3 tumours. siVEGF or siLuc/uPIC was intravenously injected on each measurement day into tumour-bearing mice, as indicated by arrows. Tumour size was determined by the following equation: (length of major axis)  $\times$  (length of minor axis)  $\times$  (height)  $\times$   $\pi/6$ . Data represent the means  $\pm$  s.e.m.  $n = 7$ . **b**, Body weights of tumour-bearing mice treated with siVEGF or siLuc/uPIC described in (a). Data represent the means  $\pm$  s.e.m.  $n = 7$ .

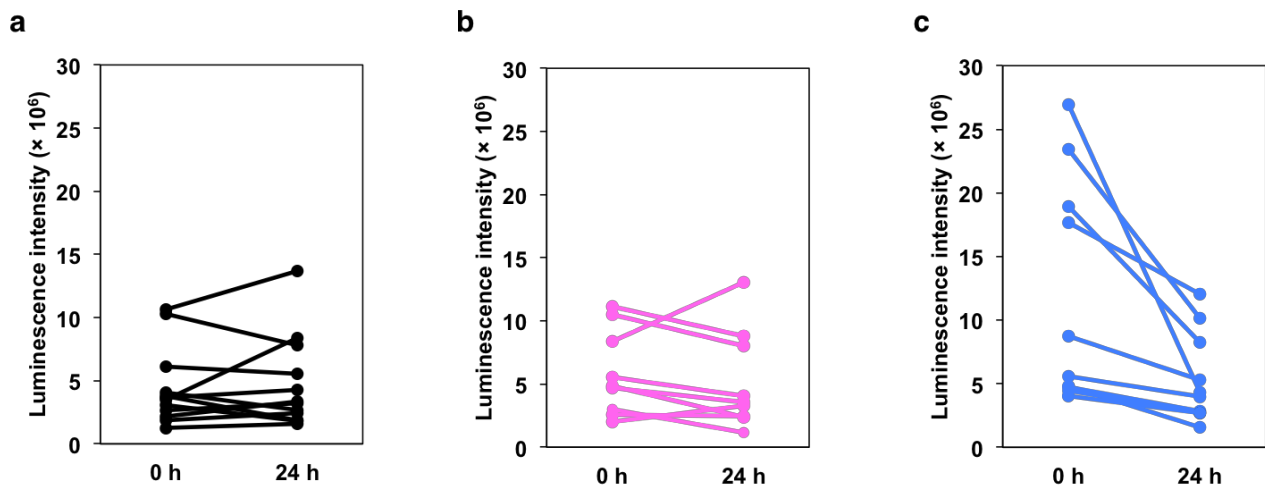

**Supplementary Figure 13 | Luminescence intensity in a spontaneous pancreatic tumour model.**

The luminescence intensity from luciferase-expressing pancreatic tumours was measured using an IVIS instrument before and 24 h after systemic injection of PBS (a), siScr/uPIC (b), or siLuc/uPIC (c). uPIC solutions were prepared at A/P = 10 and the dosage of siRNA was  $1.2 \text{ mg kg}^{-1}$ .



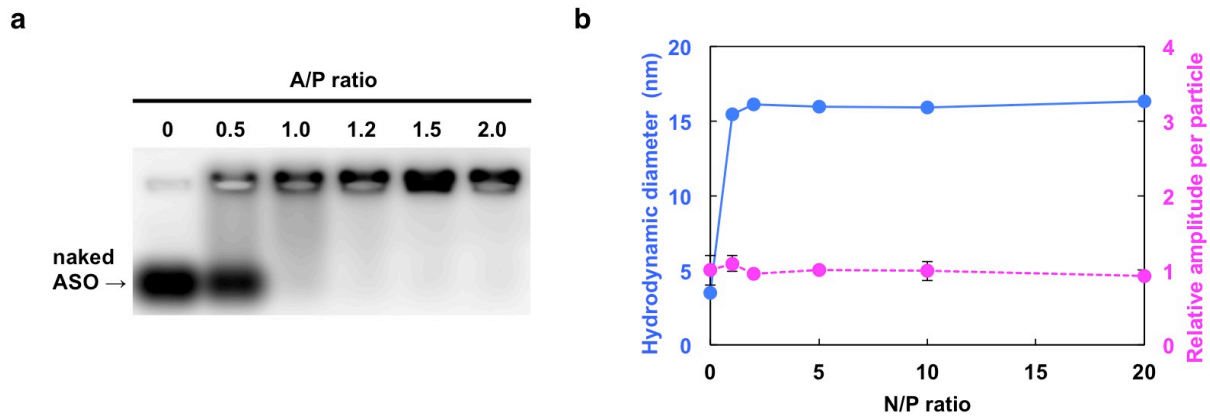

**Supplementary Figure 14 | uPIC formation between ASO and YBC. a,** Agarose gel retardation analysis of PIC samples prepared with ASO at varying A/P ratios. **b,** Hydrodynamic diameter of A647-ASO complexed with YBC at varying A/P ratios, and the corresponding association number of ASO per PIC, as determined by FCS. Data represent the means  $\pm$  s.d. for 5 replicate measurements.

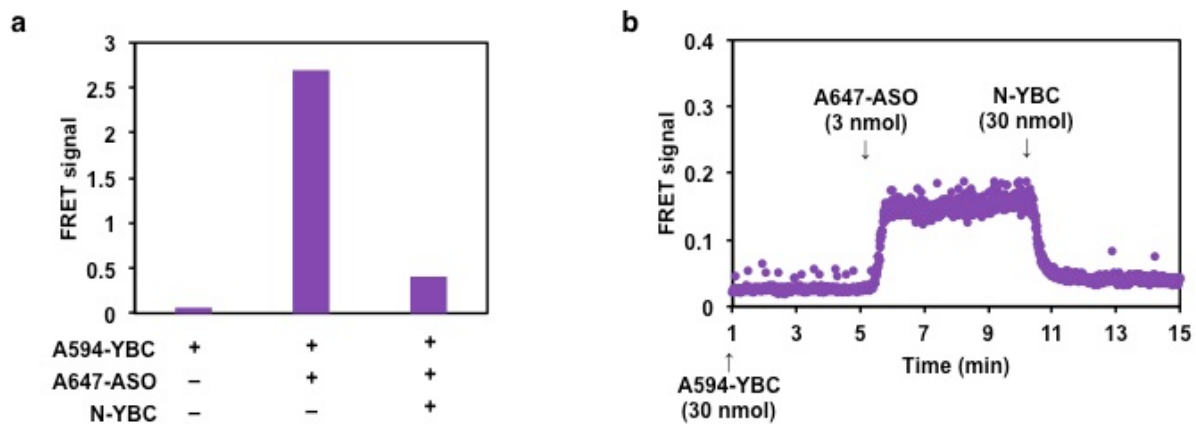

**Supplementary Figure 15 | FRET analysis of the dynamic ion-pairing of ASO/uPIC with free YBC. a,** Change in FRET signal of A594-YBC in buffer solution. **b,** Time-dependent change in FRET signal obtained from IVCLSM observation of the bloodstream injected sequentially with A594-YBC, A647-ASO, and N-YBC.

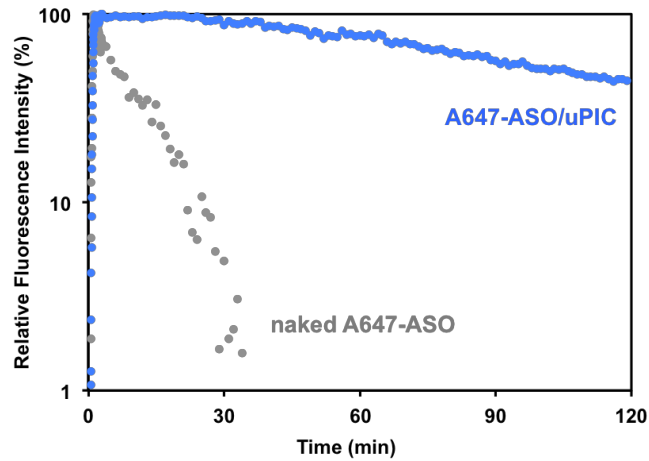

**Supplementary Figure 16 | Blood circulation properties of ASO/uPIC.** Time-dependent change in A647 fluorescence determined by quantitative analysis of IVCLSM data.

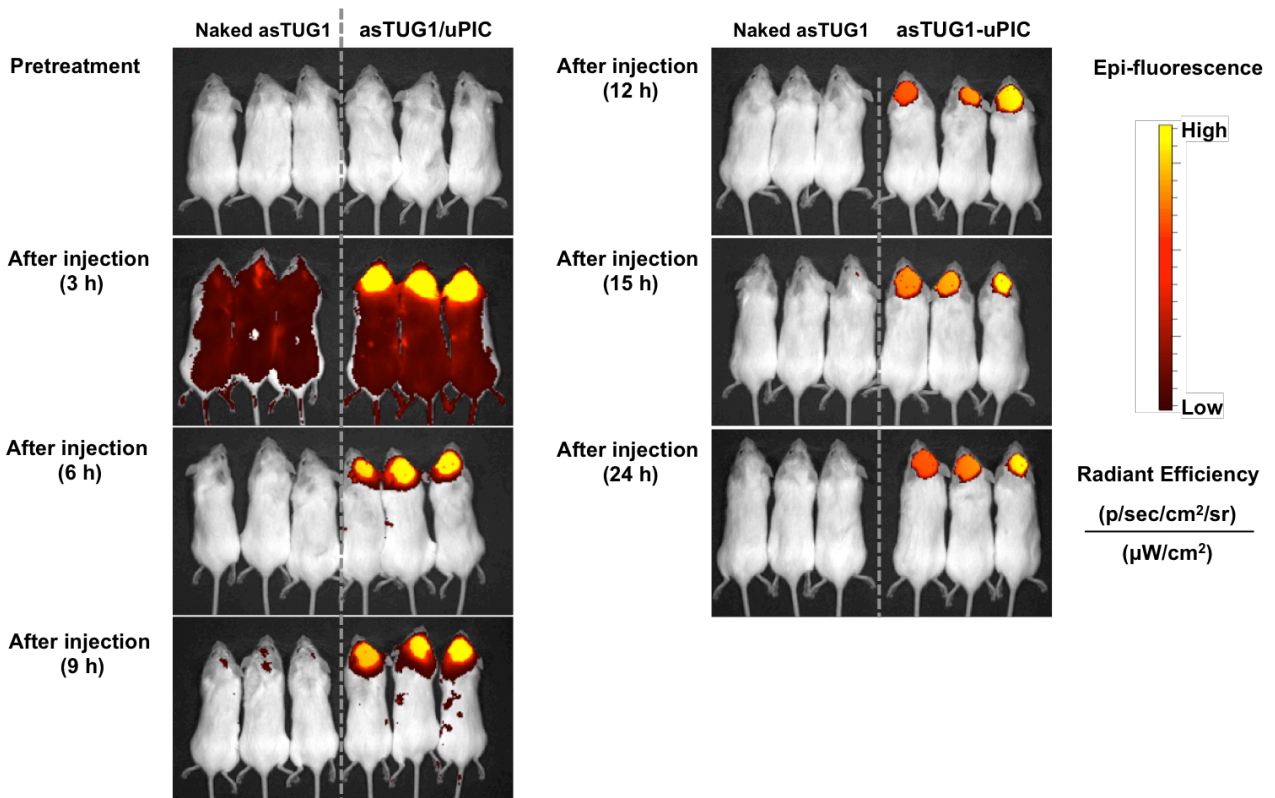

**Supplementary Figure 17 | Accumulation profiles of naked ASO and ASO/uPIC in orthotopic brain tumours.** Time-dependent change in A647 fluorescence in tumour-bearing mice was monitored using an IVIS instrument. These images were used for the quantitative analysis of ASO accumulation in brain tumours.



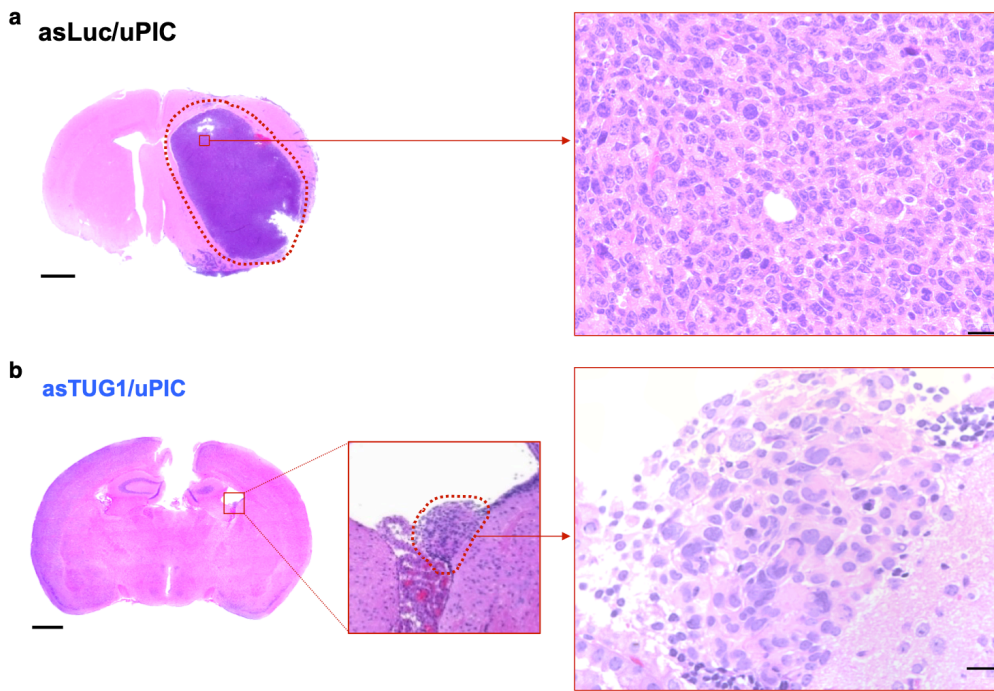

**Supplementary Figure 18 | Magnified images of representative HE-stained whole brain sections shown in Figure 5c.** The tumour areas are surrounded by the red dotted line. The scale bars indicate 1 mm and 20  $\mu$ m in the left whole brain images and the right magnified images, respectively. The brain was harvested from the mouse treated with asLuc/uPIC (a) or asTUG1/uPIC (b).

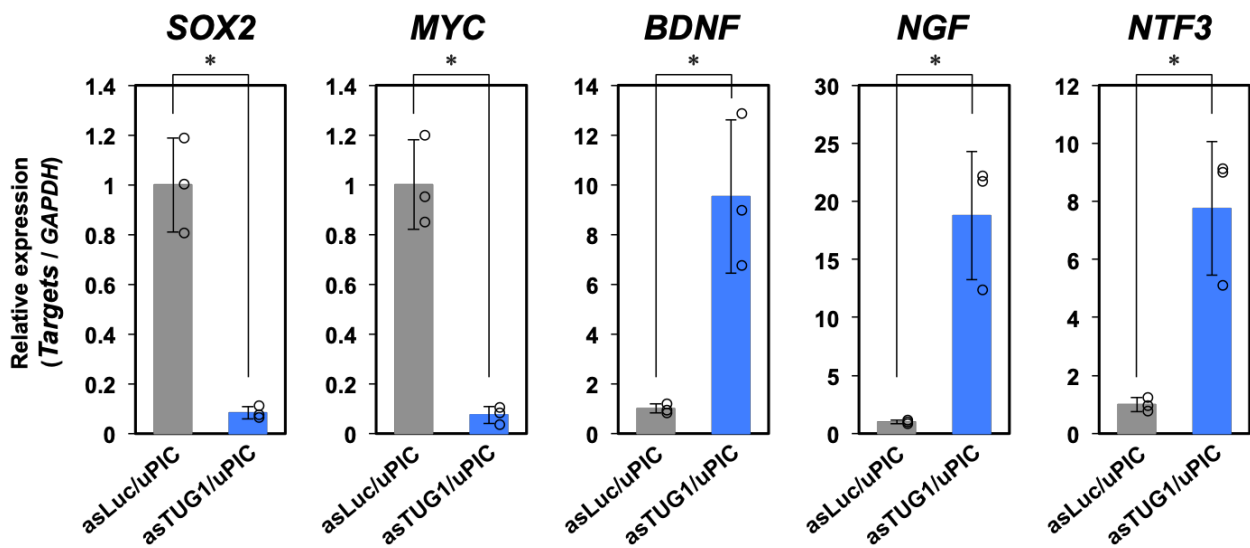

**Supplementary Figure 19 | Expression profiles of stemness-associated genes (*SOX2* and *MYC*) and neuronal differentiation-associated genes (*BDNF*, *NGF*, and *NTF3*) in orthotopic brain tumour tissues after treatment with asLuc/uPIC or asTUG1/uPIC.** Data represent the means  $\pm$  s.d.  $n = 3$ . \* $P < 0.01$ .

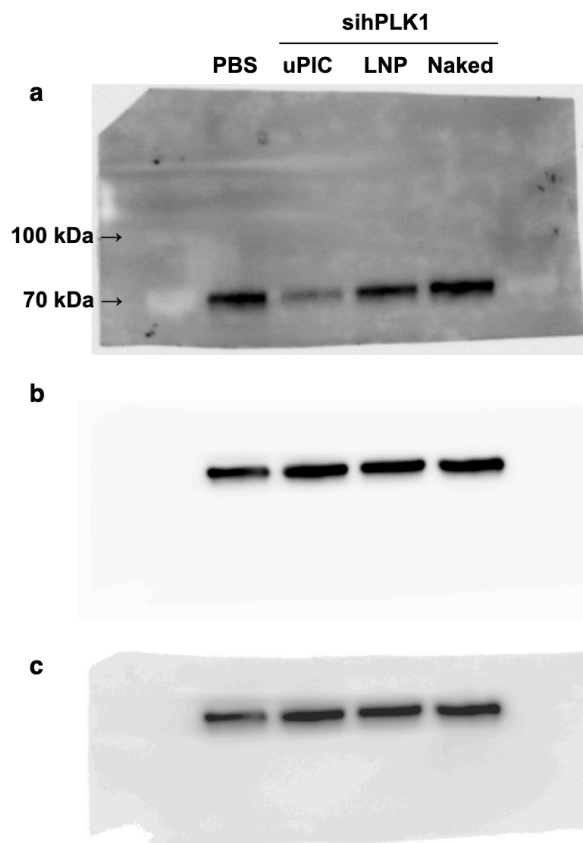

**Supplementary Figure 20 | Uncropped images of western blotting gels. a,b,** Unprocessed images of western blotting gels stained for *PLK1* protein (**a**) and *β-actin* protein (**b**) in the subcutaneous pancreatic tumour tissues. **c,** Slightly processed image of western blotting gel stained for *β-actin* protein.

**Supplementary Table 1.** Structural information of siRNA and ASO used in this study

| Type  | Name <sup>a</sup>  | Sense Sequence (5' to 3') <sup>b</sup>                                             | Antisense Sequence (5' to 3') <sup>b</sup>              | Ref |
|-------|--------------------|------------------------------------------------------------------------------------|---------------------------------------------------------|-----|
| siRNA | siLuc <sup>c</sup> | CUU ACG CUG AGU ACU UCG Att                                                        | UCG AAG UAC UCA GCG UAA Gtt                             | 1   |
|       | sihPLK1            | AGA U <sub>M</sub> CA CCC U <sub>M</sub> CC UU <sub>M</sub> A AAU <sub>M</sub> AUU | UAU UUA AG <sub>M</sub> G AGG GUG AU <sub>M</sub> C UUU | 2   |
|       | simPLK1            | GCA GCA GGA AAC CUC UCA Att                                                        | UUG AGA GGU UUC CUG CUG Ctt                             | 3   |
|       | siVEGF             | GGA GUA CCC UGA UGA GAU Ctt                                                        | GAU CUC AUC AGG GUA CUC Ctt                             | 4   |
|       | siScr              | UUC UCC GAA CGU GUC ACG Utt                                                        | ACG UGA CAC GUU CGG AGA Att                             | –   |
| ASO   | asLuc <sup>c</sup> | –                                                                                  | <b>T*C*G*A*a*g*t*a*c*t*c*a*g*c*g*t*a*a*G*T*T</b>        | 1   |
|       | asTUG1             | –                                                                                  | <b>T*G*A*A*ttt*c*a*a*t*c*a*ttt*g*a*G*A*T</b>            | 5   |

<sup>a</sup> Luc: luciferase, h/mPLK1: human/mouse polo-like kinase 1, VEGF: vascular endothelial growth factor, Scr: scramble, TUG1: taurine upregulated gene 1.

<sup>b</sup> Uppercase: RNA, Lowercase: DNA, X<sub>M</sub>: 2'-O-methyl-modified RNA, Bold uppercase: LNA, asterisk: phosphorothiolate.

<sup>c</sup> siLuc and asLuc were used as fluorescently labelled nucleic acids. Cy5- and A647-siRNA: Cy5 and Alexa Fluor 647 dyes were attached to the 5' end of the sense strand of siLuc. FRET-siRNA: Alexa Fluor 594 and 647 dyes were attached to the 3' and 5' ends of the antisense strand of siLuc. A647-ASO: Alexa Fluor 647 dye was attached to the 5' end of asLuc.

**Supplementary Table 2.** List of primers used in this study

| Target gene     | Assay ID in TaqMan™<br>Gene expression Assay | Primer sequence (5' to 3') |                           |
|-----------------|----------------------------------------------|----------------------------|---------------------------|
|                 |                                              | Forward                    | Reverse                   |
| <i>hPLK1</i>    | Hs00153444_m1                                |                            |                           |
| <i>18S rRNA</i> | Hs99999901_s1                                |                            |                           |
| <i>TUG1</i>     |                                              | AGGTAGAACCTCTATGCATTTTGTG  | ACTCTTGCTTCACTACTTCATCCAG |
| <i>SOX2</i>     |                                              | AAGAAAGGGAGAGAAGTTTGAGCC   | GGCTCCGCGAGGAAAATC        |
| <i>MYC</i>      |                                              | GCTGCTTAGACGCTGGATTT       | CACCGAGTCGTAGTCGAGGT      |
| <i>BDNF</i>     |                                              | ATTTTGGGTTAGGAGAAGTCAAGTT  | GTGATCACTAACATTTTCAGGTGTG |
| <i>NGF</i>      |                                              | GGACCCAATAACAGTTTTACCAAG   | ACATTGCTCTCTGAGTGTGGTTC   |
| <i>NTF3</i>     |                                              | ACAATATTTTTATGAAACGCGATGT  | CCACGAGTTTATTGTTCTCTGAAGT |
| <i>GAPDH</i>    |                                              | CCTCCCCTTCGCTCTCT          | GGCGACGCAAAAGAAGATG       |

## References

1. Elbashir, S. M. *et al.* Duplexes of 21-nucleotide RNAs mediate RNA interference in cultured mammalian cells. *Nature* **411**, 494–498 (2001).
2. Judge, A. D. *et al.* Confirming the RNAi-mediated mechanism of action of siRNA-based cancer therapeutics in mice. *J. Clin. Invest.* **119**, 661–673 (2009).
3. Raab, M. *et al.* Toxicity modelling of Plk1-targeted therapies in genetically engineered mice and cultured primary mammalian cells. *Nature Commun.* **2**, 395 (2011).
4. Takei, Y., Kadomatsu, K., Yuzawa, Y., Matsuo, S. & Muramatsu, T. A small interfering RNA targeting vascular endothelial growth factor as cancer therapeutics. *Cancer Res.* **64**, 3365–3370 (2004).
5. Katsushima, K. *et al.* Targeting the notch-regulated non-coding RNA TUG1 for glioma treatment. *Nature Commun.* **7**, 13616 (2016).
