# Supplementary material for: In vivo rendezvous of small nucleic acid drugs with charge-matched block catiomers to target cancers
Source: PubMed Central journal article supplement (PMC6482185; doi:10.1038/s41467-019-09856-w), 2019-04-24
Supplement: 41467_2019_9856_MOESM3_ESM.pdf [file 41467_2019_9856_MOESM3_ESM.pdf]

## Description of Additional Supplementary Files

**Supplementary Movie 1. A proposed animation of the dynamic equilibrium of uPIC with free YBC.**

**Supplementary Movie 2. *In vivo* FRET analysis of the dynamic equilibrium of uPIC by IVCLSM.** A594-YBC was intravenously injected into the mouse, followed by sequential injections of A647-siRNA and N-YBC. The FRET signal is expressed as a rainbow scale (high: magenta, low: blue). A part of this movie is used as [Figure 2c–e](#).

**Supplementary Movie 3. Blood circulation profile of naked A647-siRNA in the murine earlobe dermis observed by IVCLSM.** A part of this movie is used as [Figure 3a, b](#), and the fluorescence intensity was quantified and is presented in [Figure 3e](#).

**Supplementary Movie 4. Blood circulation profile of A647-siRNA/uPIC in the murine earlobe dermis observed by IVCLSM.** A part of this movie is used as [Figure 3c, d](#), and the fluorescence intensity was quantified and is presented in [Figure 3e](#).

**Supplementary Movie 5. *In vivo* FRET analysis of siRNA integrity in the bloodstream.** FRET-siRNA (A594/A647 dual-labelled siRNA)/uPIC was intravenously injected into the mouse. The FRET signal was quantified and is presented in [Figure 3f](#).

**Supplementary Movie 6. Time-dependent distribution profile of naked Cy5-siRNA in subcutaneous GFP-BxPC3 tumour tissue.** Left: merged signal, centre: GFP signal, and right: Cy5-siRNA signal. A part of this movie is used in [Supplementary Figure 11a](#), and the results were quantitatively analysed for presentation in [Figure 3h, i](#).

**Supplementary Movie 7. Time-dependent distribution profile of Cy5-siRNA/uPIC in subcutaneous GFP-BxPC3 tumour tissue.** Left: merged signal, centre: GFP signal, and right: Cy5-siRNA signal. A part of this movie is used in [Supplementary Figure 11b](#), and the quantitatively analysed results are represented in [Figure 3h, j](#).

**Supplementary Movie 8. Time-dependent distribution profile of Cy5-siRNA/Invivofectamine in subcutaneous GFP-BxPC3 tumour tissue.** Left: merged signal, centre: GFP signal, and right: Cy5-siRNA signal. A part of this movie is used in [Supplementary Figure 11c](#), and the quantitatively analysed results are represented in [Figure 3h, k](#).
